# Supplementary material for: Screening Potential Reference Genes in Tuta absoluta with Real-Time Quantitative PCR Analysis under Different Experimental Conditions
Source: MDPI journal article supplement (doi:10.3390/genes12081253), 2021-08-17
Supplement: s1 [file s1]

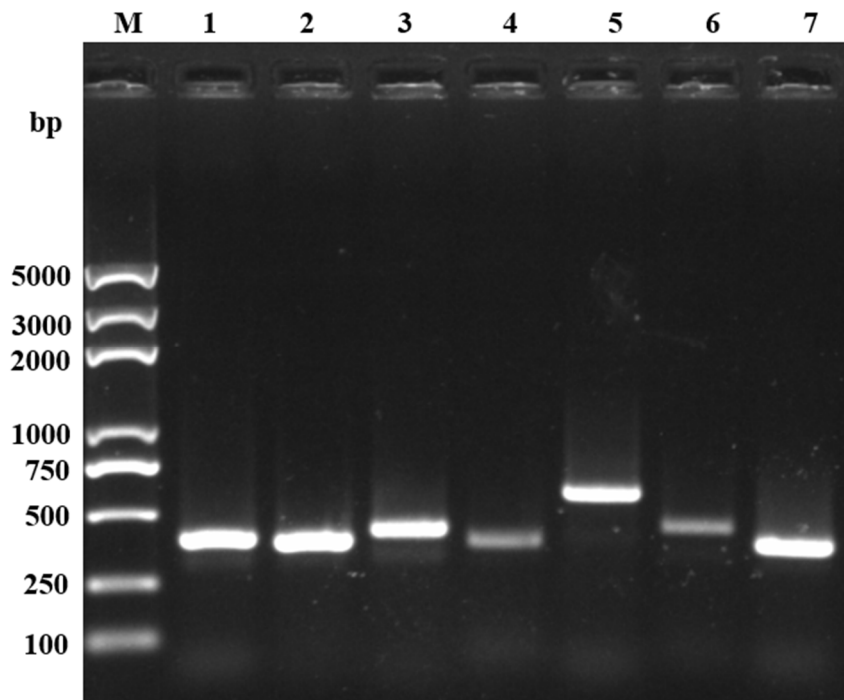

**Figure S1.** Single amplicon of desired size for the seven candidate reference genes in *Tuta absoluta* visualized on 1% agarose gel. DNA ladder marker (M), RPL27 (1), EF1- $\alpha$  (2), TUB (3), TBP (4),  $\beta$ -actin (5), RPS15 (6), and RPS13 (7) genes, respectively.

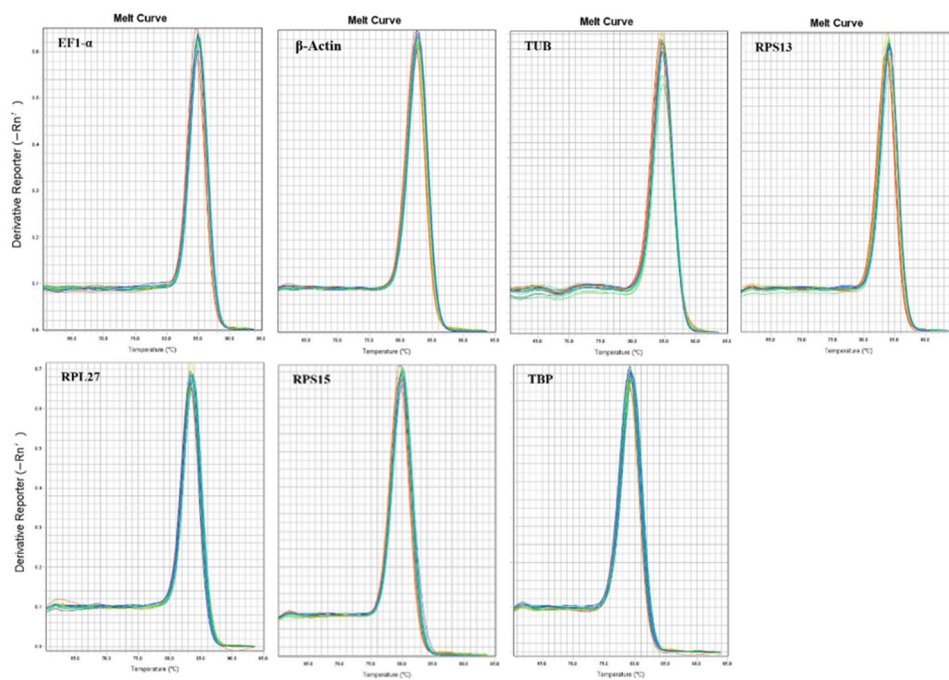

**Figure S2.** Melting curves and melting peaks of the seven candidate reference genes in *Tuta absoluta*.
